# Supplementary material
Source: PubMed Central journal article supplement (PMC10124819)
Supplement: NIHMS1879027-supplement-Table.pdf [file NIHMS1879027-supplement-Table.pdf]

**Supplemental Table 1 Proportional hazards mortality estimates, Washington injured workers, 1994-2000 injuries, adjusting for age, earnings, and industry.**

|                                                          | Women <sup>a</sup>        |                         | Men <sup>b</sup>          |                         |
|----------------------------------------------------------|---------------------------|-------------------------|---------------------------|-------------------------|
|                                                          | Hazard Ratio <sup>c</sup> | 95% Confidence Interval | Hazard Ratio <sup>c</sup> | 95% Confidence Interval |
| <b>Lost-time Injury<sup>c</sup></b>                      | 1.24                      | 1.21-1.28               | 1.22                      | 1.20-1.24               |
| <b>Earnings, Year Before Injury (2007 \$)</b>            |                           |                         |                           |                         |
| 0 - 9,999                                                | 1.91                      | 1.79-2.04               | 2.02                      | 1.95-2.09               |
| 10,000 - 19,999                                          | 1.57                      | 1.47-1.68               | 1.65                      | 1.60-1.71               |
| 20,000 - 29,999                                          | 1.36                      | 1.27-1.45               | 1.46                      | 1.41-1.51               |
| 30,000 - 39,999                                          | 1.17                      | 1.09-1.25               | 1.29                      | 1.24-1.34               |
| 40,000 - 49,999                                          | 1.11                      | 1.03-1.19               | 1.14                      | 1.10-1.19               |
| 50,000 – 60,000 (Reference group)                        |                           |                         |                           |                         |
| 60,000 – 70,000                                          | 0.91                      | 0.83-1.00               | 0.92                      | 0.89-0.96               |
| 70,000+                                                  | 0.84                      | 0.76-0.92               | 0.80                      | 0.77-0.83               |
| <b>Industry</b>                                          |                           |                         |                           |                         |
| Agriculture, Forestry, and Fishing                       | 0.74                      | 0.66-0.83               | 0.77                      | 0.73-0.81               |
| Mining                                                   | 1.31                      | 0.70-2.45               | 1.15                      | 1.01-1.30               |
| Construction                                             | 1.05                      | 0.92-1.20               | 1.05                      | 1.00-1.09               |
| Nondurable Manufacturing                                 | 1.03                      | 0.94-1.13               | 1.04                      | 1.00-1.09               |
| Durable Manufacturing                                    | 1.13                      | 1.03-1.24               | 1.13                      | 1.08-1.18               |
| Transportation and Communication                         | 0.94                      | 0.84-1.04               | 1.01                      | 0.96-1.06               |
| Wholesale Trade (Reference group)                        |                           |                         |                           |                         |
| Retail Trade                                             | 1.09                      | 1.01-1.18               | 1.02                      | 0.98-1.06               |
| Finance, Insurance, and Real Estate                      | 1.00                      | 0.91-1.11               | 1.13                      | 1.05-1.21               |
| Hospitality, Recreation, Business, and Personal Services | 1.12                      | 1.03-1.22               | 1.13                      | 1.08-1.18               |
| Healthcare Services                                      | 1.05                      | 0.97-1.13               | 1.00                      | 0.94-1.07               |
| Legal, Educational, and Social Services                  | 0.89                      | 0.82-0.96               | 0.90                      | 0.86-0.94               |
| Public Administration                                    | 1.01                      | 0.92-1.11               | 0.95                      | 0.91-1.00               |

<sup>a</sup> Women: 84,805 lost-time injuries, 188,925 medical-only injuries

<sup>b</sup> Men: 153,126 lost-time injuries, 309,619 medical-only injuries

<sup>c</sup> Lost-time injuries involve more than 3 calendar days lost from work or permanent disability benefits. Medical-only injuries have 3 or fewer days lost from work and no permanent disability benefits. Hazard ratios estimated for both women and men separately, with injury, pre-injury earnings, and industry in the model and stratified by age to allow for a different baseline hazard for each age group, so no hazard ratios were estimated for age groups.

---

NOTE: Data are linked Washington State workers' compensation data (identifying injured workers, injury type, and industry) and Social Security Administration data (identifying earnings, age, and mortality status).
